# Supplementary material
Source: PubMed Central journal article supplement (PMC4990478)
Supplement: NIHMS777348-supplement-1.pdf [file NIHMS777348-supplement-1.pdf]

--- SUPPLEMENTARY INFORMATION ---

## **Histone deacetylase 6 structure and molecular basis of catalysis and inhibition**

Yang Hai<sup>1</sup> & David W. Christianson<sup>1,2\*</sup>

<sup>1</sup>Roy and Diana Vagelos Laboratories, Department of Chemistry, University of Pennsylvania, Philadelphia, Pennsylvania 19104-6323, USA. <sup>2</sup>Radcliffe Institute for Advanced Study and Department of Chemistry and Chemical Biology, Harvard University, Cambridge, Massachusetts 02138, USA. \*e-mail: [chris@sas.upenn.edu](mailto:chris@sas.upenn.edu)

## SUPPLEMENTARY RESULTS

**Supplementary Table 1. Steady-state kinetics of HDAC6 catalytic domains<sup>a</sup>**

| <b>Substrate 1</b> | <b>K<sub>M</sub> (μM)</b> | <b>k<sub>cat</sub> (s<sup>-1</sup>)</b> | <b>k<sub>cat</sub>/K<sub>M</sub> (M<sup>-1</sup>s<sup>-1</sup>)</b> |
|--------------------|---------------------------|-----------------------------------------|---------------------------------------------------------------------|
| hCD12              | 22 ± 6                    | 0.05 ± 0.01                             | (2.3 ± 0.9) × 10 <sup>3</sup>                                       |
| hCD12 Y386F        | 26 ± 9                    | 0.06 ± 0.02                             | (2.3 ± 0.9) × 10 <sup>3</sup>                                       |
| hCD12 Y782F        | 62 ± 4                    | 0.00030 ± 0.00002                       | 4.8 ± 0.3                                                           |
| hCD12 Y386F/Y782F  | 69 ± 3                    | 0.00021 ± 0.00001                       | 3.0 ± 0.2                                                           |
| zCD12              | 38 ± 6                    | 0.8 ± 0.1                               | (2.10 ± 0.08) × 10 <sup>4</sup>                                     |
| zCD12 H194A        | 31 ± 9                    | 0.7 ± 0.1                               | (2.3 ± 0.8) × 10 <sup>4</sup>                                       |
| zCD12 H574A        | 65 ± 9                    | 0.082 ± 0.007                           | (1.2 ± 0.1) × 10 <sup>3</sup>                                       |
| zCD1               | 87 ± 9                    | 0.079 ± 0.006                           | (0.9 ± 0.1) × 10 <sup>3</sup>                                       |
| zCD2               | 29 ± 9                    | 0.56 ± 0.09                             | (1.9 ± 0.5) × 10 <sup>4</sup>                                       |
| <b>Substrate 8</b> | <b>K<sub>M</sub> (μM)</b> | <b>k<sub>cat</sub> (s<sup>-1</sup>)</b> | <b>k<sub>cat</sub>/K<sub>M</sub> (M<sup>-1</sup>s<sup>-1</sup>)</b> |
| hFLWT <sup>b</sup> | 7 ± 4                     | 0.04 ± 0.01                             | (6 ± 1) × 10 <sup>3</sup>                                           |
| hCD12              | 11 ± 4                    | 0.049 ± 0.009                           | (4.4 ± 0.9) × 10 <sup>3</sup>                                       |
| hCD1               | n.a.                      | n.a.                                    | n.a.                                                                |
| hCD2               | 22 ± 3                    | 0.020 ± 0.002                           | (0.91 ± 0.03) × 10 <sup>3</sup>                                     |
| hCD12 Y386F        | 16 ± 4                    | 0.06 ± 0.02                             | (4 ± 1) × 10 <sup>3</sup>                                           |
| hCD12 Y782F        | 42 ± 4                    | 0.0003 ± 0.0001                         | 7 ± 2                                                               |
| hCD12 Y386F/Y782F  | 39 ± 3                    | 0.0004 ± 0.0002                         | 9 ± 2                                                               |
| hCD12 Y225F/Y782F  | 56 ± 9                    | 0.048 ± 0.004                           | (0.86 ± 0.06) × 10 <sup>3</sup>                                     |
| hCD12 K353L/Y782F  | 52 ± 6                    | 0.002 ± 0.001                           | 40 ± 10                                                             |
| hCD2 D567A         | 26 ± 3                    | 0.022 ± 0.006                           | (0.8 ± 0.1) × 10 <sup>3</sup>                                       |
| hCD2 S568A         | 21 ± 5                    | 0.0020 ± 0.0007                         | 90 ± 10                                                             |
| zCD12              | 28 ± 3                    | 0.98 ± 0.09                             | (3.5 ± 0.5) × 10 <sup>4</sup>                                       |
| zCD12 H194A        | 19 ± 6                    | 0.60 ± 0.05                             | (3.2 ± 0.4) × 10 <sup>4</sup>                                       |
| zCD12 H574A        | 38 ± 7                    | 0.23 ± 0.07                             | (6.2 ± 0.9) × 10 <sup>3</sup>                                       |
| zCD1               | 43 ± 6                    | 0.20 ± 0.06                             | (4.7 ± 0.3) × 10 <sup>3</sup>                                       |
| zCD1 K330L         | 32 ± 7                    | 0.155 ± 0.009                           | (5 ± 1) × 10 <sup>3</sup>                                           |
| zCD1 H82F/F202Y    | 47 ± 4                    | 0.016 ± 0.006                           | (0.34 ± 0.9) × 10 <sup>3</sup>                                      |
| zCD2               | 22 ± 9                    | 0.69 ± 0.08                             | (3.1 ± 0.5) × 10 <sup>4</sup>                                       |
| zCD2 H573A         | 8 ± 3                     | 0.00021 ± 0.00004                       | 26 ± 4                                                              |
| zCD2 H574A         | 9 ± 2                     | 0.0006 ± 0.0001                         | 67 ± 6                                                              |
| zCD2 N530A         | 40 ± 10                   | 0.7 ± 0.1                               | (1.7 ± 0.9) × 10 <sup>4</sup>                                       |
| zCD2 S531A         | 240 ± 40                  | 0.03 ± 0.01                             | (0.12 ± 0.04) × 10 <sup>3</sup>                                     |

| <b>Substrate 9</b>  | <b>K<sub>M</sub> (μM)</b> | <b>k<sub>cat</sub> (s<sup>-1</sup>)</b> | <b>k<sub>cat</sub>/K<sub>M</sub> (M<sup>-1</sup>s<sup>-1</sup>)</b> |
|---------------------|---------------------------|-----------------------------------------|---------------------------------------------------------------------|
| hCD12               | 100 ± 20                  | 0.26 ± 0.02                             | (2.7 ± 0.5) × 10 <sup>3</sup>                                       |
| hCD12 Y386F         | 90 ± 40                   | 0.18 ± 0.04                             | (1.9 ± 0.9) × 10 <sup>3</sup>                                       |
| hCD12 Y782F         | 50 ± 10                   | 0.080 ± 0.006                           | (1.5 ± 0.4) × 10 <sup>3</sup>                                       |
| zCD1                | 100 ± 20                  | 0.9 ± 0.1                               | (8.6 ± 0.9) × 10 <sup>3</sup>                                       |
| zCD2                | 140 ± 50                  | 1.2 ± 0.3                               | (8.0 ± 2.0) × 10 <sup>3</sup>                                       |
| zCD12               | 110 ± 30                  | 2.0 ± 0.3                               | (1.9 ± 0.4) × 10 <sup>4</sup>                                       |
| <b>Substrate 10</b> | <b>K<sub>M</sub> (μM)</b> | <b>k<sub>cat</sub> (s<sup>-1</sup>)</b> | <b>k<sub>cat</sub>/K<sub>M</sub> (M<sup>-1</sup>s<sup>-1</sup>)</b> |
| hCD12               | 80 ± 20                   | 0.20 ± 0.02                             | (2.3 ± 0.4) × 10 <sup>3</sup>                                       |
| hCD12 Y386F         | 120 ± 20                  | 0.13 ± 0.01                             | (2.3 ± 0.4) × 10 <sup>3</sup>                                       |
| hCD12 Y782F         | 80 ± 10                   | 0.078 ± 0.005                           | (1.0 ± 0.1) × 10 <sup>3</sup>                                       |
| zCD1                | 120 ± 40                  | 0.9 ± 0.2                               | (7.0 ± 2.0) × 10 <sup>3</sup>                                       |
| zCD2                | 110 ± 20                  | 0.82 ± 0.08                             | (7.3 ± 0.7) × 10 <sup>3</sup>                                       |
| zCD12               | 80 ± 20                   | 1.5 ± 0.1                               | (1.9 ± 0.2) × 10 <sup>4</sup>                                       |
| <b>Substrate 11</b> | <b>K<sub>M</sub> (μM)</b> | <b>k<sub>cat</sub> (s<sup>-1</sup>)</b> | <b>k<sub>cat</sub>/K<sub>M</sub> (M<sup>-1</sup>s<sup>-1</sup>)</b> |
| hCD12               | 210 ± 70                  | 0.11 ± 0.04                             | (0.59 ± 0.08) × 10 <sup>3</sup>                                     |
| hCD12 Y386F         | 140 ± 60                  | 0.10 ± 0.02                             | (0.7 ± 0.2) × 10 <sup>3</sup>                                       |
| hCD12 Y782F         | n.a.                      | n.a.                                    | n.a.                                                                |
| zCD1                | n.d. <sup>d</sup>         | n.d.                                    | 11 ± 6                                                              |
| zCD2                | 110 ± 20                  | 0.44 ± 0.04                             | (4.0 ± 0.4) × 10 <sup>3</sup>                                       |
| zCD12               | 150 ± 30                  | 0.62 ± 0.08                             | (4.2 ± 0.5) × 10 <sup>3</sup>                                       |
| <b>Substrate 12</b> | <b>K<sub>M</sub> (μM)</b> | <b>k<sub>cat</sub> (s<sup>-1</sup>)</b> | <b>k<sub>cat</sub>/K<sub>M</sub> (M<sup>-1</sup>s<sup>-1</sup>)</b> |
| hCD12               | 70 ± 30                   | 0.25 ± 0.04                             | (4 ± 1) × 10 <sup>3</sup>                                           |
| hCD12 Y386F         | 80 ± 30                   | 0.26 ± 0.04                             | (3.1 ± 0.9) × 10 <sup>3</sup>                                       |
| hCD12 Y782F         | n.a.                      | n.a.                                    | n.a.                                                                |
| zCD1                | 90 ± 30                   | 0.047 ± 0.006                           | (0.6 ± 0.1) × 10 <sup>3</sup>                                       |
| zCD2                | 80 ± 20                   | 0.9 ± 0.1                               | (1.2 ± 0.2) × 10 <sup>4</sup>                                       |
| zCD12               | 70 ± 10                   | 1.3 ± 0.1                               | (1.8 ± 0.3) × 10 <sup>4</sup>                                       |
| <b>Substrate 13</b> | <b>K<sub>M</sub> (μM)</b> | <b>k<sub>cat</sub> (s<sup>-1</sup>)</b> | <b>k<sub>cat</sub>/K<sub>M</sub> (M<sup>-1</sup>s<sup>-1</sup>)</b> |
| hCD12               | 70 ± 20                   | 0.07 ± 0.01                             | (0.9 ± 0.1) × 10 <sup>3</sup>                                       |
| hCD12 Y386F         | 60 ± 7                    | 0.060 ± 0.002                           | (0.97 ± 0.08) × 10 <sup>3</sup>                                     |
| hCD12 Y782F         | n.d.                      | n.d.                                    | 3 ± 1                                                               |
| zCD1                | n.d.                      | n.d.                                    | 20 ± 10                                                             |
| zCD2                | 130 ± 50                  | 0.39 ± 0.07                             | (3.0 ± 0.7) × 10 <sup>3</sup>                                       |
| zCD12               | 200 ± 40                  | 0.58 ± 0.06                             | (2.9 ± 0.4) × 10 <sup>3</sup>                                       |

<sup>a</sup>Data represent mean values ± s.e.m. (n=3). <sup>b</sup>hFLWT, human full-length wild-type HDAC6 from Enzo Life Sciences. <sup>c</sup>n.a., no activity. <sup>d</sup>n.d., not determined.

**Supplementary Table 2. Data collection and refinement statistics.**

|                                                     | zCD1-TSA<br>complex           | zCD2-TSA<br>complex                 | MBP-hCD2-TSA<br>complex                         | Unliganded zCD2               |
|-----------------------------------------------------|-------------------------------|-------------------------------------|-------------------------------------------------|-------------------------------|
| <b>Data collection</b>                              |                               |                                     |                                                 |                               |
| Space group                                         | <i>P2<sub>1</sub></i>         | <i>P2<sub>1</sub>2<sub>1</sub>2</i> | <i>P2<sub>1</sub>2<sub>1</sub>2<sub>1</sub></i> | <i>P1</i>                     |
| Cell dimensions                                     |                               |                                     |                                                 |                               |
| a, b, c (Å),                                        | 52.9, 123.7, 55.2             | 83.9, 94.4, 51.7                    | 49.3, 149.0, 216.3                              | 48.5, 55.4, 74.2              |
| α, β, γ (°)                                         | 90.0, 113.8, 90.0             | 90.0, 90.0, 90.0                    | 90.0, 90.0, 90.0                                | 73.6, 89.8, 82.6              |
| Resolution (Å) <sup>*</sup>                         | 45.04 - 2.15<br>(2.24 - 2.15) | 50.00 - 1.59<br>(1.66 - 1.59)       | 149.00 - 2.79<br>(2.90 - 2.79)                  | 50.00 - 2.00<br>(2.08 - 2.00) |
| <i>R</i> <sub>merge</sub>                           | 0.178 (0.701)                 | 0.061 (0.033)                       | 0.204 (1.853)                                   | 0.162 (0.501)                 |
| <i>R</i> <sub>pim</sub>                             | 0.122 (0.493)                 | 0.050 (0.297)                       | 0.141 (0.607)                                   | 0.162 (0.509)                 |
| <i>I</i> / <i>σ</i> <i>I</i>                        | 10.6 (2.0)                    | 23.7 (4.3)                          | 12.9 (1.9)                                      | 6.4 (1.8)                     |
| Completeness (%)                                    | 99.0 (95.9)                   | 100.0 (100.0)                       | 100.0 (100.0)                                   | 97.0 (96.6)                   |
| Redundancy <sup>a</sup>                             | 3.1 (2.8)                     | 2.5 (2.4)                           | 11.0 (11.3)                                     | 1.9 (1.9)                     |
| CC <sub>1/2</sub>                                   | 0.754 (0.536)                 | 0.935 (0.865)                       | 0.986 (0.585)                                   | 0.967 (0.662)                 |
| <b>Refinement</b>                                   |                               |                                     |                                                 |                               |
| Resolution (Å)                                      | 45.04 - 2.15<br>(2.23 - 2.15) | 44.01 - 1.59<br>(1.65 - 1.59)       | 87.54 - 2.79<br>(2.89 - 2.79)                   | 15.91 - 2.00<br>(2.07 - 2.00) |
| No. reflections                                     | 34834 (3335)                  | 55924 (5519)                        | 40788 (4012)                                    | 47957 (4586)                  |
| <i>R</i> <sub>work</sub> / <i>R</i> <sub>free</sub> | 0.211/0.255<br>(0.282/0.325)  | 0.129/0.163<br>(0.128/0.187)        | 0.213/0.275<br>(0.313/0.377)                    | 0.224/0.272<br>(0.276/0.316)  |
| No. atoms                                           |                               |                                     |                                                 |                               |
| Protein                                             | 5558                          | 2836                                | 3260                                            | 5541                          |
| Ligand/ion                                          | 63                            | 77                                  | 77                                              | 12                            |
| Water                                               | 164                           | 376                                 | 355                                             | 305                           |
| <i>B</i> factors (Å <sup>2</sup> )                  |                               |                                     |                                                 |                               |
| Protein                                             | 32                            | 13                                  | 55                                              | 17                            |
| Ligand/ion                                          | 34                            | 32                                  | 62                                              | 25                            |
| Water                                               | 30                            | 28                                  | 59                                              | 21                            |
| R.m.s. deviations                                   |                               |                                     |                                                 |                               |
| bond lengths (Å)                                    | 0.006                         | 0.010                               | 0.004                                           | 0.006                         |
| bond angles (°)                                     | 0.9                           | 1.2                                 | 0.8                                             | 1.0                           |

Each dataset was collected from a single crystal. \*Values in parentheses are for highest-resolution shell.

**Supplementary Table 3. Data collection and refinement statistics.**

|                                     | H574A zCD2-<br>substrate <b>8</b><br>complex | Y785F zCD2-<br>substrate <b>1</b><br>complex | zCD2-HC toxin<br>complex      | zCD2-trifluoro-<br>ketone inhibitor<br>complex | zCD2-acetate<br>complex       |
|-------------------------------------|----------------------------------------------|----------------------------------------------|-------------------------------|------------------------------------------------|-------------------------------|
| <b>Data collection</b>              |                                              |                                              |                               |                                                |                               |
| Space group                         | $P2_1$                                       | $P2_12_12$                                   | $P2_12_12$                    | $P2_12_12_1$                                   | $P2_12_12_1$                  |
| Cell dimensions                     |                                              |                                              |                               |                                                |                               |
| a, b, c (Å),                        | 55.0, 84.0, 87.0                             | 83.3, 94.7, 51.6                             | 83.5, 94.1, 51.5              | 74.6, 92.4, 96.2                               | 75.1, 91.8, 96.2              |
| $\alpha$ , $\beta$ , $\gamma$ (°)   | 90.0, 98.1, 90.0                             | 90.0, 90.0, 90.0                             | 90.0, 90.0, 90.0              | 90.0, 90.0, 90.0                               | 90.0, 90.0, 90.0              |
| Resolution (Å) <sup>*</sup>         | 50.00 - 1.80<br>(1.87 - 1.80)                | 50.00 - 1.82<br>(1.88 - 1.82)                | 50.00 - 1.73<br>(1.79 - 1.73) | 50.00 - 2.16<br>(2.24 - 2.16)                  | 50.00 - 2.25<br>(2.33 - 2.25) |
| $R_{\text{merge}}$                  | 0.142 (0.713)                                | 0.164 (0.655)                                | 0.151 (0.442)                 | 0.148 (0.334)                                  | 0.130 (0.356)                 |
| $R_{\text{pim}}$                    | 0.098 (0.509)                                | 0.049 (0.344)                                | 0.061 (0.273)                 | 0.061 (0.178)                                  | 0.055 (0.212)                 |
| $I / \sigma I$                      | 9.9 (1.8)                                    | 13.6 (1.1)                                   | 14.0 (1.6)                    | 13.5 (3.0)                                     | 14.5 (2.8)                    |
| Completeness (%)                    | 98.9 (99.9)                                  | 99.4 (94.1)                                  | 98.7 (90.6)                   | 98.8 (90.3)                                    | 99.3 (93.9)                   |
| Redundancy <sup>a</sup>             | 3.0 (3.0)                                    | 11.0 (4.1)                                   | 6.6 (3.1)                     | 6.6 (3.9)                                      | 6.3 (3.5)                     |
| CC <sub>1/2</sub>                   | 0.975 (0.524)                                | 0.958 (0.692)                                | 0.976 (0.808)                 | 0.977 (0.933)                                  | 0.969 (0.856)                 |
| <b>Refinement</b>                   |                                              |                                              |                               |                                                |                               |
| Resolution (Å)                      | 12.34 - 1.80<br>(1.87 - 1.80)                | 45.32 - 1.81<br>(1.88 - 1.81)                | 47.07 - 1.73<br>(1.79 - 1.73) | 49.71 - 2.16<br>(2.24 - 2.16)                  | 49.77 - 2.24<br>(2.33 - 2.24) |
| No. reflections                     | 70922 (6942)                                 | 37343 (3333)                                 | 42831 (3774)                  | 35829 (3223)                                   | 32149 (2879)                  |
| $R_{\text{work}} / R_{\text{free}}$ | 0.162/0.194<br>(0.238/0.270)                 | 0.157/0.183<br>(0.260/0.265)                 | 0.152/0.173<br>(0.224/0.244)  | 0.196/0.242<br>(0.221/0.275)                   | 0.212/0.234<br>(0.280/0.319)  |
| No. atoms                           |                                              |                                              |                               |                                                |                               |
| Protein                             | 5718                                         | 2792                                         | 2817                          | 5581                                           | 5603                          |
| Ligand/ion                          | 28                                           | 33                                           | 25                            | 24                                             | 22                            |
| Water                               | 25                                           | 29                                           | 27                            | 23                                             | 26                            |
| $B$ factors (Å <sup>2</sup> )       |                                              |                                              |                               |                                                |                               |
| Protein                             | 5718                                         | 2792                                         | 2817                          | 5581                                           | 5603                          |
| Ligand/ion                          | 28                                           | 33                                           | 25                            | 24                                             | 22                            |
| Water                               | 25                                           | 29                                           | 27                            | 23                                             | 26                            |
| R.m.s. deviations                   |                                              |                                              |                               |                                                |                               |
| bond lengths (Å)                    | 0.008                                        | 0.009                                        | 0.012                         | 0.005                                          | 0.005                         |
| bond angles (°)                     | 1.0                                          | 1.1                                          | 1.2                           | 1.0                                            | 1.0                           |

Each dataset was collected from a single crystal. \*Values in parentheses are for highest-resolution shell.

**Supplementary Table 4. Data collection and refinement statistics.**

|                                     | zCD2-SAHA complex             | zCD2-Belinostat complex       | zCD2-HPOB complex             | zCD2-Panobinostat complex     | zCD2-Oxamflatin complex       |
|-------------------------------------|-------------------------------|-------------------------------|-------------------------------|-------------------------------|-------------------------------|
| <b>Data collection</b>              |                               |                               |                               |                               |                               |
| Space group                         | $P2_1$                        | $P2_12_12_1$                  | $P1$                          | $P2_12_12$                    | $P2_12_12$                    |
| Cell dimensions                     |                               |                               |                               |                               |                               |
| a, b, c (Å),                        | 54.8, 83.6, 86.8              | 76.0, 95.5, 96.3              | 48.7, 56.6, 74.8              | 65.2, 91.9, 140.4             | 83.5, 94.4, 51.6              |
| $\alpha, \beta, \gamma$ (°)         | 90.0, 98.1, 90.0              | 90.0, 90.0, 90.0              | 106.4, 90.1, 97.1             | 90.0, 90.0, 90.0              | 90.0, 90.0, 90.0              |
| Resolution (Å) <sup>*</sup>         | 50.00 - 1.32<br>(1.38 - 1.32) | 50.00 - 1.85<br>(1.92 - 1.85) | 50.60 - 1.90<br>(1.97 - 1.90) | 50.00 - 2.60<br>(2.71 - 2.60) | 50.00 - 2.54<br>(2.63 - 2.54) |
| $R_{\text{merge}}$                  | 0.124 (1.170)                 | 0.167 (0.831)                 | 0.143 (0.754)                 | 0.217 (0.699)                 | 0.137 (0.311)                 |
| $R_{\text{pim}}$                    | 0.043 (0.481)                 | 0.078 (0.328)                 | 0.114 (0.640)                 | 0.088 (0.334)                 | 0.065 (0.185)                 |
| $I / \sigma I$                      | 40.0 (2.0)                    | 13.0 (1.6)                    | 6.9 (1.6)                     | 8.3 (1.6)                     | 11.6 (3.1)                    |
| Completeness (%)                    | 95.0 (90.7)                   | 99.7 (100)                    | 97.5 (95.7)                   | 99.4 (95.6)                   | 98.8 (92.1)                   |
| Redundancy <sup>a</sup>             | 3.3 (3.1)                     | 7.5 (7.4)                     | 3.2 (3.2)                     | 6.9 (4.8)                     | 4.9 (3.1)                     |
| $CC_{1/2}$                          | 0.706 (0.215)                 | 0.996 (0.895)                 | 0.982 (0.480)                 | 0.984 (0.703)                 | 0.974 (0.882)                 |
| <b>Refinement</b>                   |                               |                               |                               |                               |                               |
| Resolution (Å)                      | 36.26 - 1.32<br>(1.37 - 1.32) | 17.06 - 1.86<br>(1.92 - 1.86) | 50.55 - 1.90<br>(1.97 - 1.90) | 49.71 - 2.60<br>(2.69 - 2.60) | 47.22 - 2.54<br>(2.63 - 2.54) |
| No. reflections                     | 170694 (15998)                | (59011/5804)                  | 58345 (5700)                  | 26488 (2368)                  | 13596 (1131)                  |
| $R_{\text{work}} / R_{\text{free}}$ | 0.125/0.147<br>(0.241/0.273)  | 0.183/0.224<br>(0.267/0.314)  | 0.181/0.288<br>(0.221/0.356)  | 0.189/0.265<br>(0.234/0.325)  | 0.147/0.157<br>(0.194/0.214)  |
| No. atoms                           |                               |                               |                               |                               |                               |
| Protein                             | 5733                          | 5570                          | 5572                          | 5595                          | 2778                          |
| Ligand/ion                          | 83                            | 52                            | 52                            | 80                            | 27                            |
| Water                               | 644                           | 343                           | 442                           | 205                           | 143                           |
| $B$ factors (Å <sup>2</sup> )       |                               |                               |                               |                               |                               |
| Protein                             | 18                            | 22                            | 18                            | 26                            | 17                            |
| Ligand/ion                          | 28                            | 27                            | 36                            | 38                            | 26                            |
| Water                               | 30                            | 28                            | 27                            | 26                            | 20                            |
| R.m.s. deviations                   |                               |                               |                               |                               |                               |
| bond lengths (Å)                    | 0.010                         | 0.006                         | 0.009                         | 0.005                         | 0.009                         |
| bond angles (°)                     | 1.2                           | 0.9                           | 1.1                           | 0.9                           | 1.1                           |

Each dataset was collected from a single crystal. \*Values in parentheses are for highest-resolution shell.

**Supplementary Table 5. Hydroxamate inhibitor-Zn<sup>2+</sup> coordination interactions.**

|                   | HO---Zn <sup>2+</sup> distance (Å) | C=O---Zn <sup>2+</sup> distance (Å) |
|-------------------|------------------------------------|-------------------------------------|
| hCD2-TSA          | 2.0                                | 2.3                                 |
|                   | 2.2                                | 2.6                                 |
| zCD1-TSA          | 1.9                                | 2.9                                 |
|                   | 2.0                                | 2.5                                 |
| zCD2-TSA          | 2.2                                | 2.4                                 |
| zCD2-SAHA         | 2.1                                | 2.2                                 |
|                   | 2.0                                | 2.2                                 |
| zCD2-Panobinostat | 2.0                                | 2.6                                 |
|                   | 2.1                                | 3.5                                 |
| zCD2-Belinostat   | 2.2                                | 2.4                                 |
|                   | 2.1                                | 2.6                                 |
| zCD2-Oxamflatin   | 2.2                                | 2.3                                 |

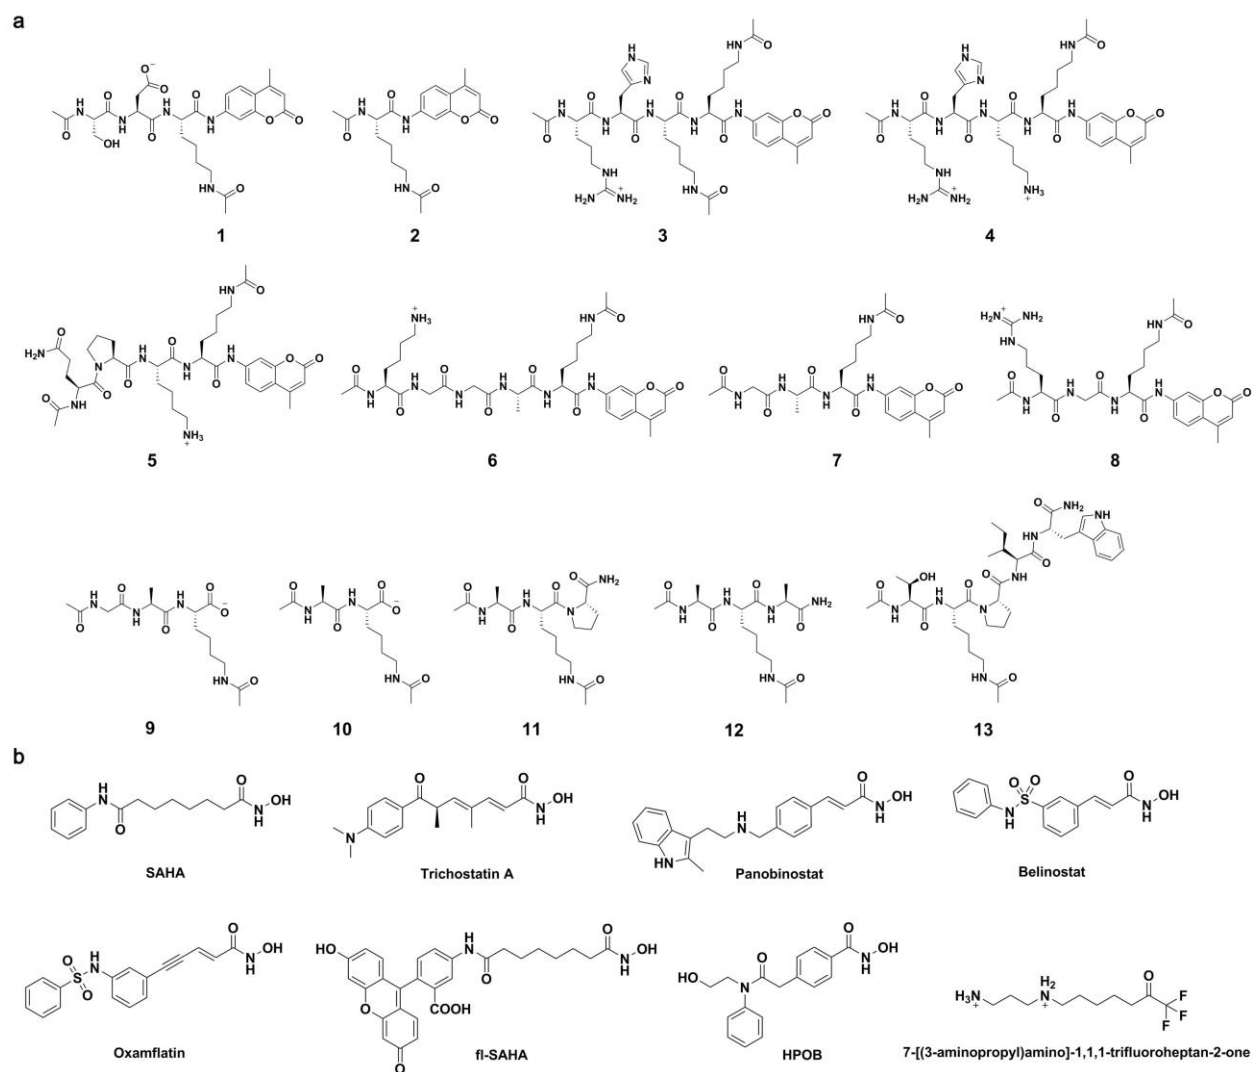

**Supplementary Figure 1. HDAC6 substrates 1-13 and inhibitors. (a)** Peptide substrates used for HDAC6 activity assays (AMC = aminomethylcoumarin). These commercially available substrates were selected based on their peptide sequence variations, which allowed us to probe HDAC6 substrate specificity. **1**, Ac-Ser-Asp-Lys(Ac)-AMC, derived from  $\alpha$ -tubulin. **2**, Ac-Lys(Ac)-AMC, generic acetyllysine substrate. **3**, Ac-Arg-His-Lys(Ac)-Lys(Ac)-AMC, derived from p53. **4**, Arg-His-Lys-Lys(Ac)-AMC, derived from p53. **5**, Ac-Gln-Pro-Lys-Lys(Ac)-AMC, derived from p53. **6**, Ac-Lys-Gly-Gly-Ala-Lys(Ac)-AMC, derived from histone H4. **7**, Ac-Gly-Ala-Lys(Ac)-AMC, derived from histone H4. **8**, Ac-Arg-Gly-Lys(Ac)-AMC, derived from histone H4. **9**, Ac-Gly-Ala-Lys(Ac), derived from histone H4. **10**, Ac-Ala-Lys(Ac), derived from histone H4. **11**, Ac-Ala-Lys(Ac)-Pro-NH<sub>2</sub>, artificial acetyllysine substrate. **12**, Ac-Ala-Lys(Ac)-Ala-NH<sub>2</sub>, artificial acetyllysine substrate. **13**, Ac-Thr-Lys(Ac)-Pro-Ile-Trp-NH<sub>2</sub>, derived from Hsp90. **(b)** Inhibitors used in this study. Abbreviations: SAHA, suberanilohydroxamic acid; fl-SAHA, fluorescein-SAHA; HPOB, *N*-hydroxy-4-(2-[(2-hydroxyethyl)(phenyl)amino]-2-oxoethyl)benzamide.



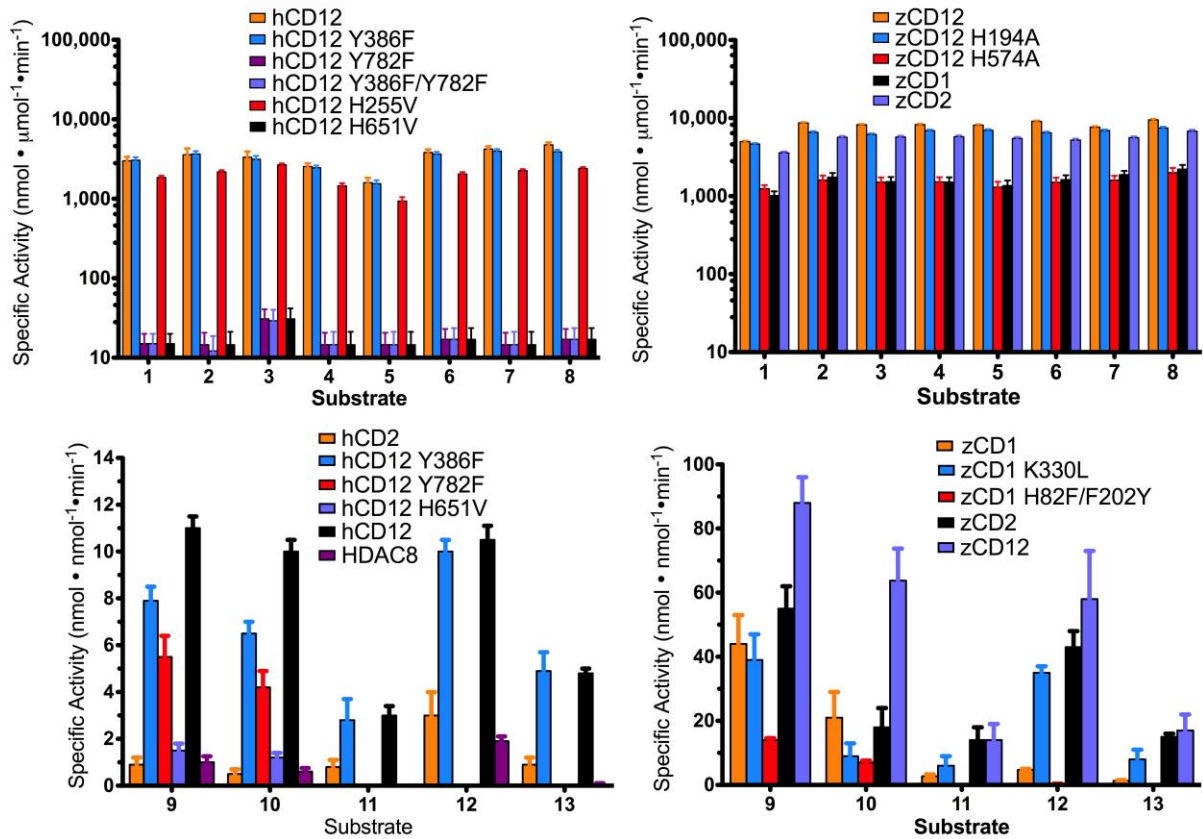

**Supplementary Figure 2. Enzyme activity measurements.** Specific activities of human and zebrafish HDAC6 constructs assayed with fluorogenic substrates 1–8 and nonfluorogenic substrates 9–13 (substrates are illustrated in **Supplementary Fig. 1a**; data represent mean values  $\pm$  s.d. (n=3)). No activity is observed with hCD1 and Y386F/Y782F hCD12, so these constructs do not appear in the figure.

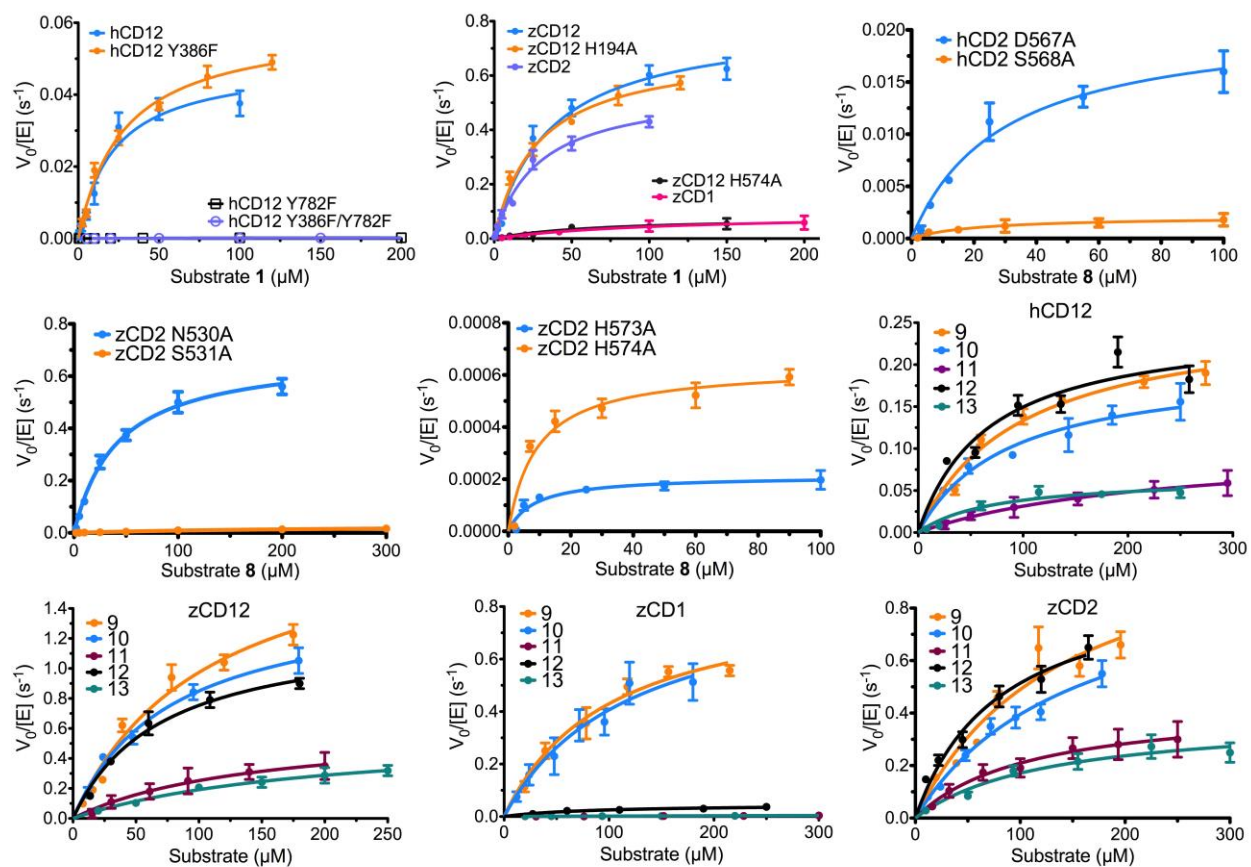

**Supplementary Figure 3. Michaelis-Menten plots.** Steady-state kinetics for human and zebrafish HDAC6 constructs assayed with fluorogenic substrates 1–8 and nonfluorogenic substrates 9–13 (substrates are illustrated in **Supplementary Fig. 1a**; data represent mean values  $\pm$  s.d. ( $n=3$ )).

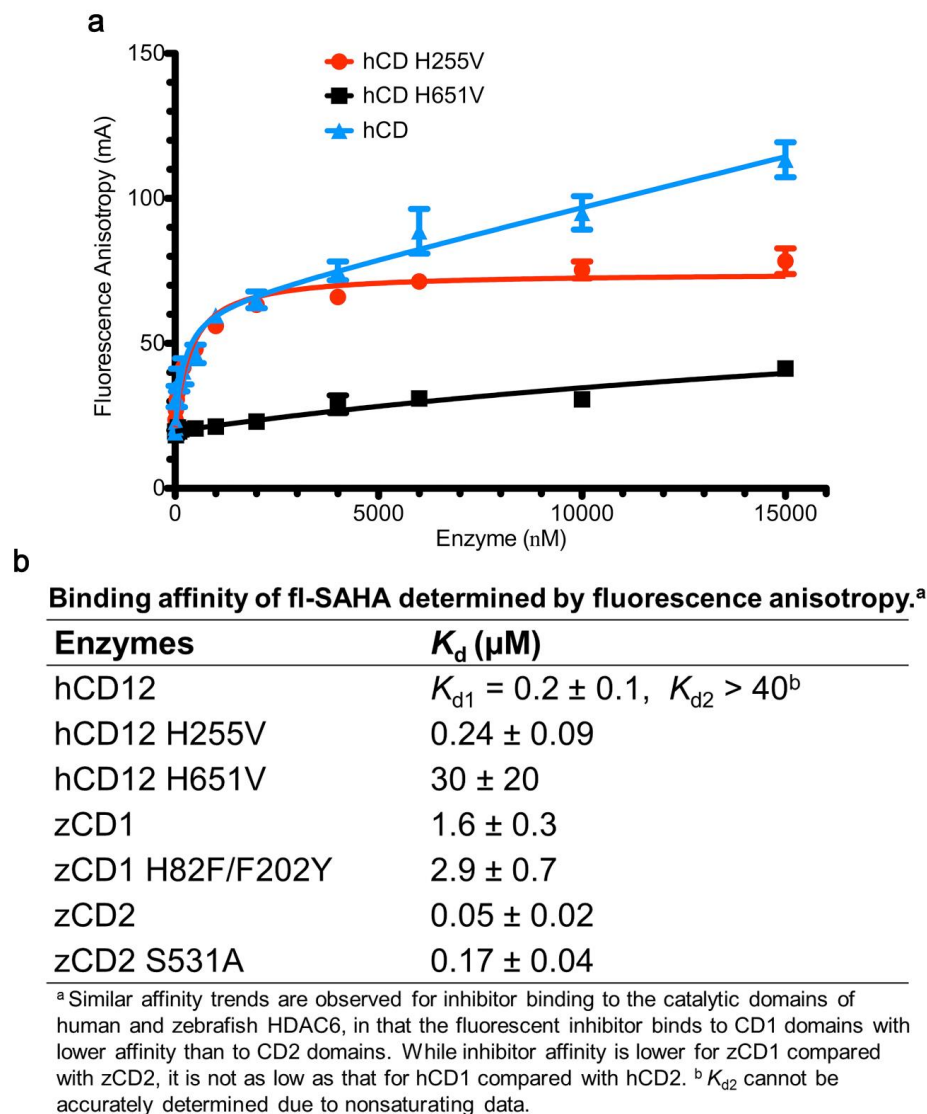

**Supplementary Figure 4. Ligand binding to catalytic domains of hHDAC6. (a)** We probed inhibitor binding to hHDAC6 using fluorescence anisotropy spectroscopy and fl-SAHA (**Supplementary Fig. 1b**). Ligand binding is characterized by a biphasic curve indicating a high affinity site ( $K_{d1} = 0.2 \pm 0.1 \mu\text{M}$ ) and a low affinity site ( $K_d > 40 \mu\text{M}$ ) (data represent mean ( $n=3$ )  $\pm$  s.d.). We then disabled ligand binding in each domain by mutating  $\text{Zn}^{2+}$  ligand H255V in hCD1 and H651V in hCD2. H255V hCD12 retains high affinity ligand binding activity, whereas H651V hCD12 exhibits 150-fold diminished affinity. These results are consistent with high-affinity binding only to hCD2. **(b)** Binding affinities of fl-SAHA to human and zebrafish HDAC6 constructs (data represent mean  $\pm$  s.e.m. ( $n=3$ )).

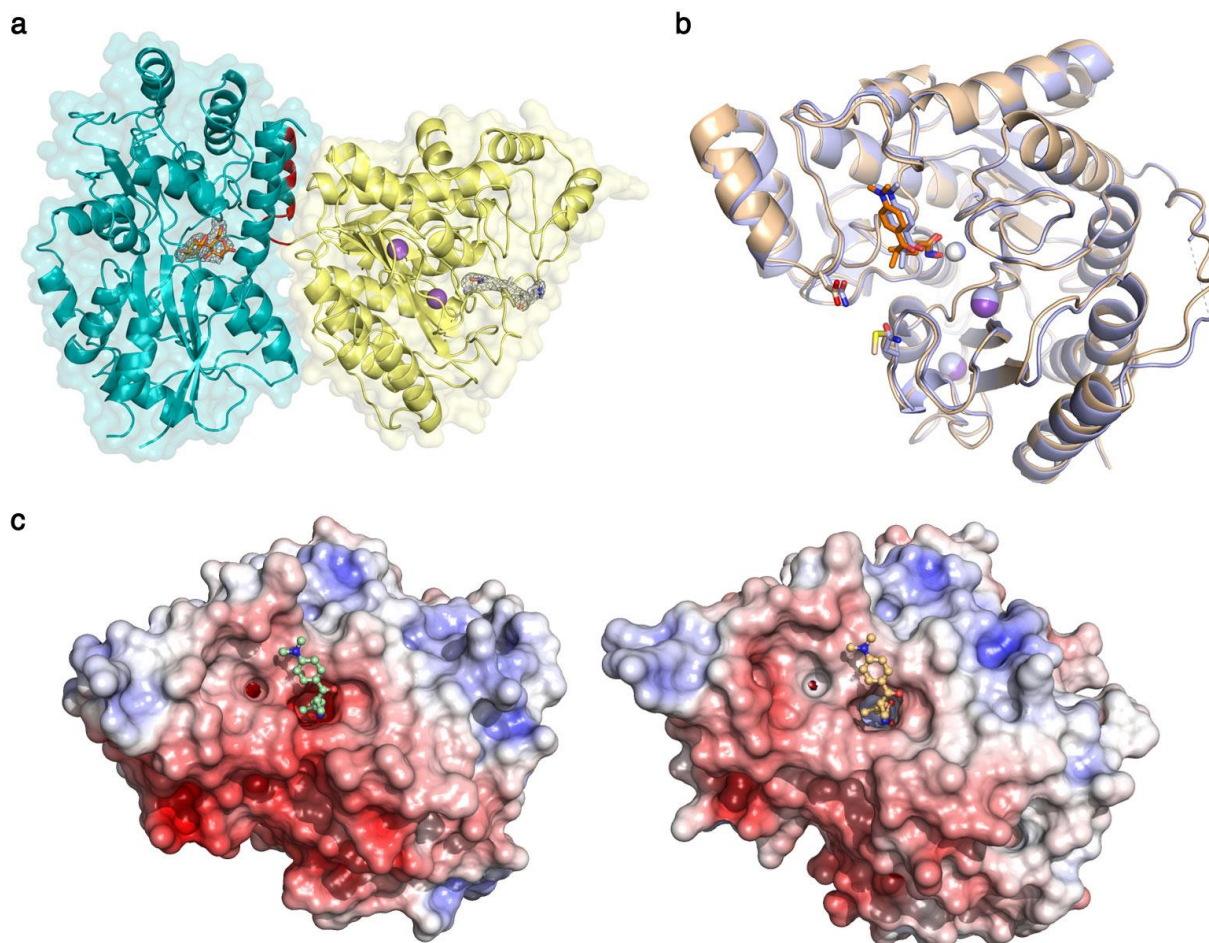

**Supplementary Figure 5. Crystal structure of MBP-hCD2 complexed with maltose and TSA.** **(a)** Simulated annealing omit map (grey mesh,  $3.0\sigma$ ) shows ligands bound to each protein. The linker (red) consists of the C-terminus of MBP (containing mutations D358A, E359A, K362A, D363A, R367N, and  $\Delta$ I368-K370) linked to an Ala<sub>3</sub> segment, which then connects to the N-terminus of hCD2. This engineered linker forms an  $\alpha$ -helix (red) that provides a complementary surface that facilitates MBP-hCD2 interactions. **(b)** Superposition of the hCD2-TSA (wheat; orange TSA) and zCD2-TSA (light blue; blue TSA) complexes. Residues D770-H771 in zCD2 are disordered and indicated by a dotted line on the right-hand side of the image. The Zn<sup>2+</sup> ion and K<sup>+</sup> ions in hCD2 are white and purple spheres, respectively; the corresponding metal ions in zCD2 are blue spheres. Only two active site residues differ between zCD2 and hCD2: N530 and N645 of zCD2 appear as D567 and M682 in hCD2, and these residues are located at the mouth of the active site, distant from the ligand binding site. **(c)** Molecular surface comparison of hCD2 (left) and zCD2 (right), color-coded by electrostatic potential (red to blue, -10 to 10 kT/e). TSA ligands are shown in ball-and-stick fashion to indicate the active site.



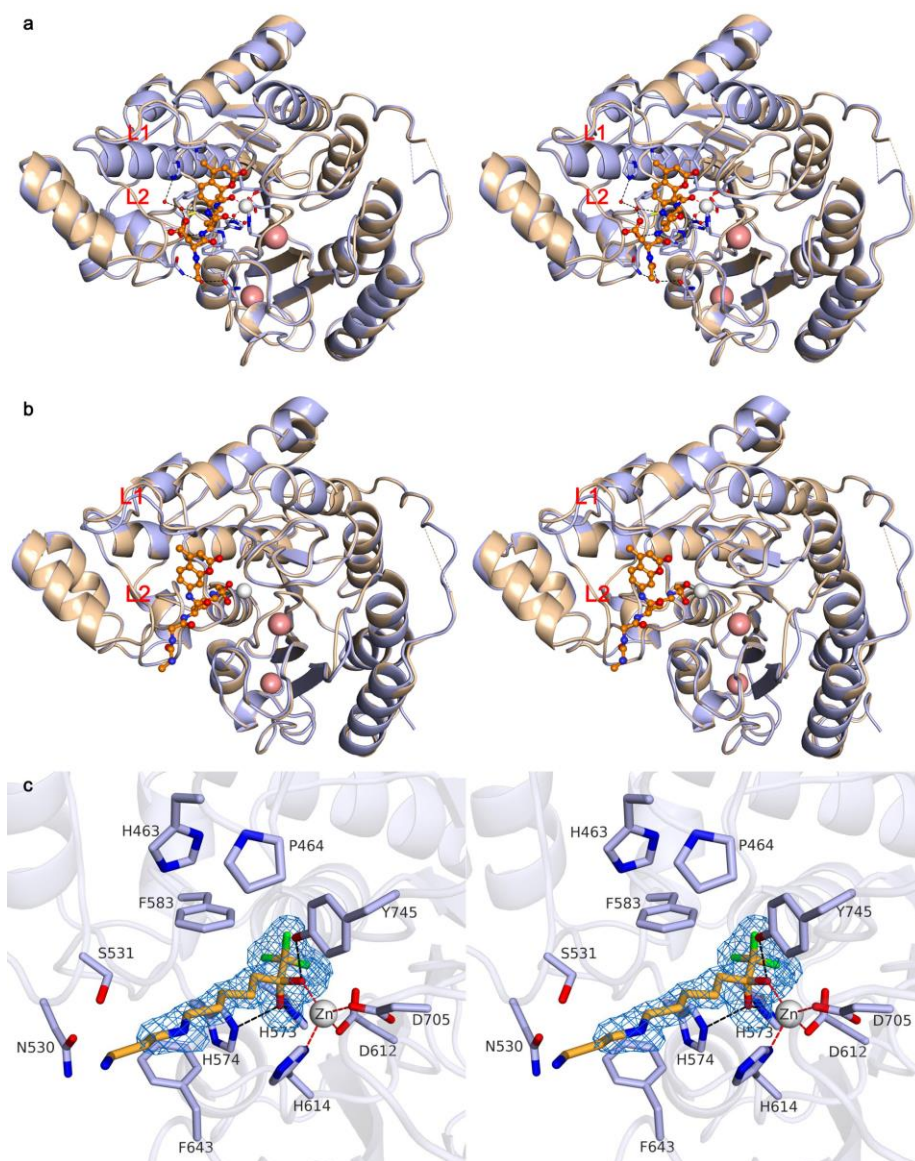

**Supplementary Figure 6. Structure of zCD2. (a)** Superposition of the zCD2-substrate **1** complex (light blue, dashed line indicating the disordered loop D770-H771) with unliganded zCD2 (wheat, dashed line indicating the disordered loop residues H771-L772). The substrate is indicated by a stick-figure; its N-terminal acetyl group and the serine side chain are not modeled due to disorder. The catalytic Zn<sup>2+</sup> ion is a white sphere and two K<sup>+</sup> ions are salmon spheres. Only minimal structural changes accompany substrate binding. **(b)** Superposition of the zCD2-substrate **8** complex (light blue) with unliganded zCD2 (wheat, dashed line indicating the disordered loop residues H771-L772). The substrate is indicated by a stick figure; its N-terminal acetyl group and the arginine side chain are not modeled due to disorder. The catalytic Zn<sup>2+</sup> ion is a white sphere and two K<sup>+</sup> ions are salmon spheres. Only minimal structural changes accompany substrate binding. **(c)** Simulated annealing omit map (blue mesh, 3.0 $\sigma$ ) of the trifluoroketone inhibitor 7-[(3-aminopropyl)amino]-1,1,1-trifluoroheptan-2-one bound as a tetrahedral gem-diolate, which mimics the tetrahedral intermediate and its flanking transition states in catalysis (orange stick figure; F atoms are green); inhibitor O1 is closer to Zn<sup>2+</sup> than O2, likely due to electrostatic stabilization of O1 as the oxyanion by Zn<sup>2+</sup> coordination as well as the adjacent CF<sub>3</sub> group.



**Supplementary Figure 7. Sequence alignment of HDAC6 orthologues.** In each domain, the Zn<sup>2+</sup> ion binding residues are highlighted in red, the conserved catalytic residues in the active site are highlighted in orange, the aspartate residue interacting with the backbone NH groups flanking the acetyllysine substrate (D101 in HDAC8) is highlighted in sky blue, the newly identified conserved serine residue important for substrate binding in HDAC6 is highlighted in magenta, and the conserved buried active site cysteine residue is highlighted in green. Remaining conserved residues with are highlighted in blue. Sequence alignment prepared with Clustal Omega, figure prepared with Jalview.



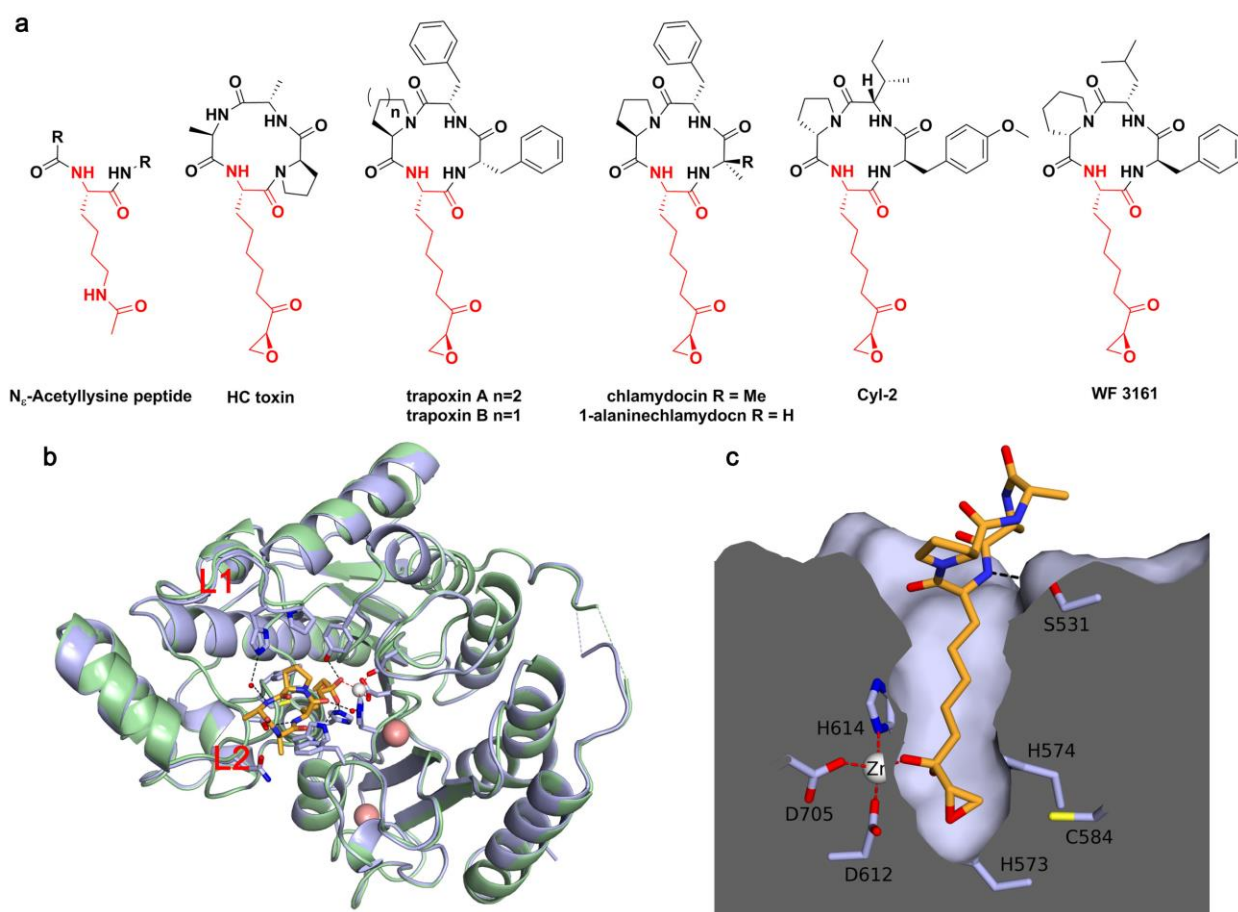

**Supplementary Figure 8. Macrocylic HDAC inhibitors, and structure of the zCD2-HC toxin complex. (a)** A class of cyclic tetrapeptides containing 2-amino-8-oxo-9,10-epoxydecanoic acid (L-Aoe, red), which partially mimics the HDAC substrate  $N_{\epsilon}$ -acetyl-L-lysine. Both the terminal epoxide and adjacent carbonyl group of the Aoe side chain are essential for inhibitory potency against HDACs. **(b)** Superposition of the zCD2-HC toxin complex (light blue, white surface) with unliganded zCD2 (green) shows that the binding of HC toxin (orange stick figure) to zCD2 does not trigger any significant conformational changes. The  $Zn^{2+}$  ion,  $K^{+}$  ion, and water molecules are shown as white, salmon, and red spheres, respectively. Disordered segments are shown as dashed lines. Notably, this is the first crystal structure of HC toxin, and hence the first observation of the novel cis-trans-cis-trans peptide bond architecture of the cyclic tetrapeptide. **(c)** Close-up view of HC toxin binding, showing the solvent-accessible surface of the active site contour. Metal coordination and hydrogen bond interactions are shown in red and black dashed lines, respectively.



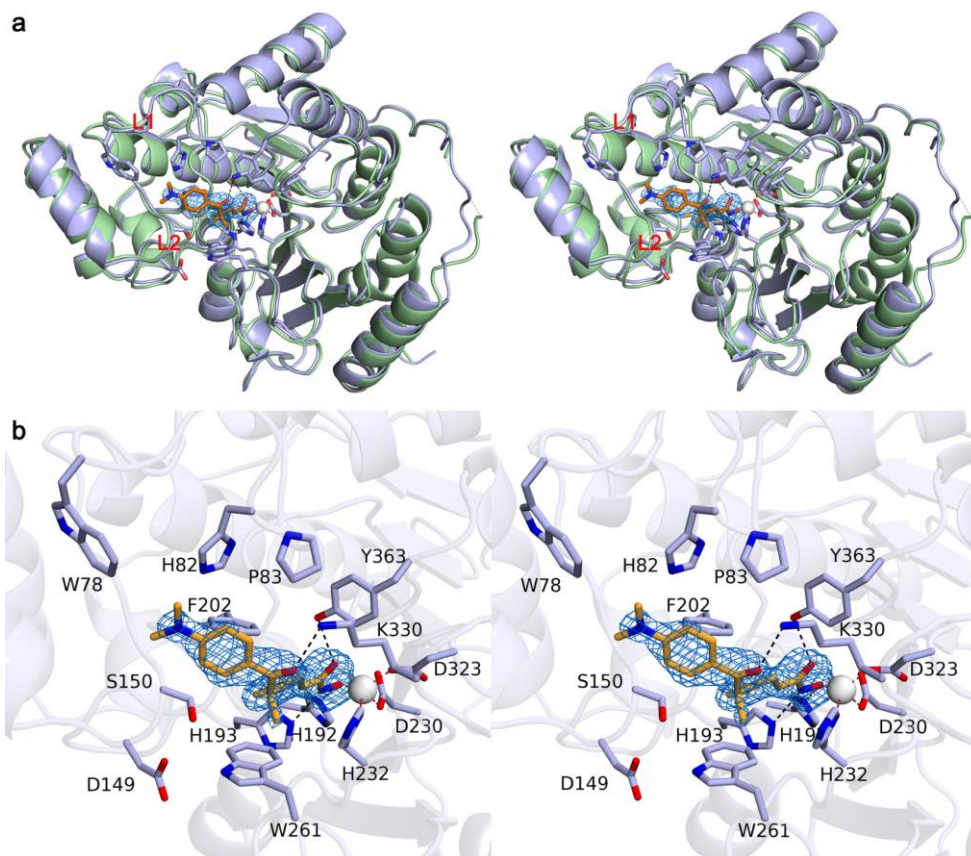

**Supplementary Figure 9. Crystal structure of zCD1.** (a) The overall structure of the zCD1-TSA complex (light blue) is highly similar to that of the zCD2-TSA complex (green), with an r.m.s. deviation of 0.58 Å for 311 C $\alpha$  atoms. The simulated annealing omit map (blue mesh, 3.0 $\sigma$ ) indicates TSA (orange) bound in the active site of zCD1; Zn<sup>2+</sup> ions are shown as white spheres. (b) Close-up view of the zCD1 active site. Metal coordination and hydrogen bond interactions are shown as red and blue dashed lines, respectively.

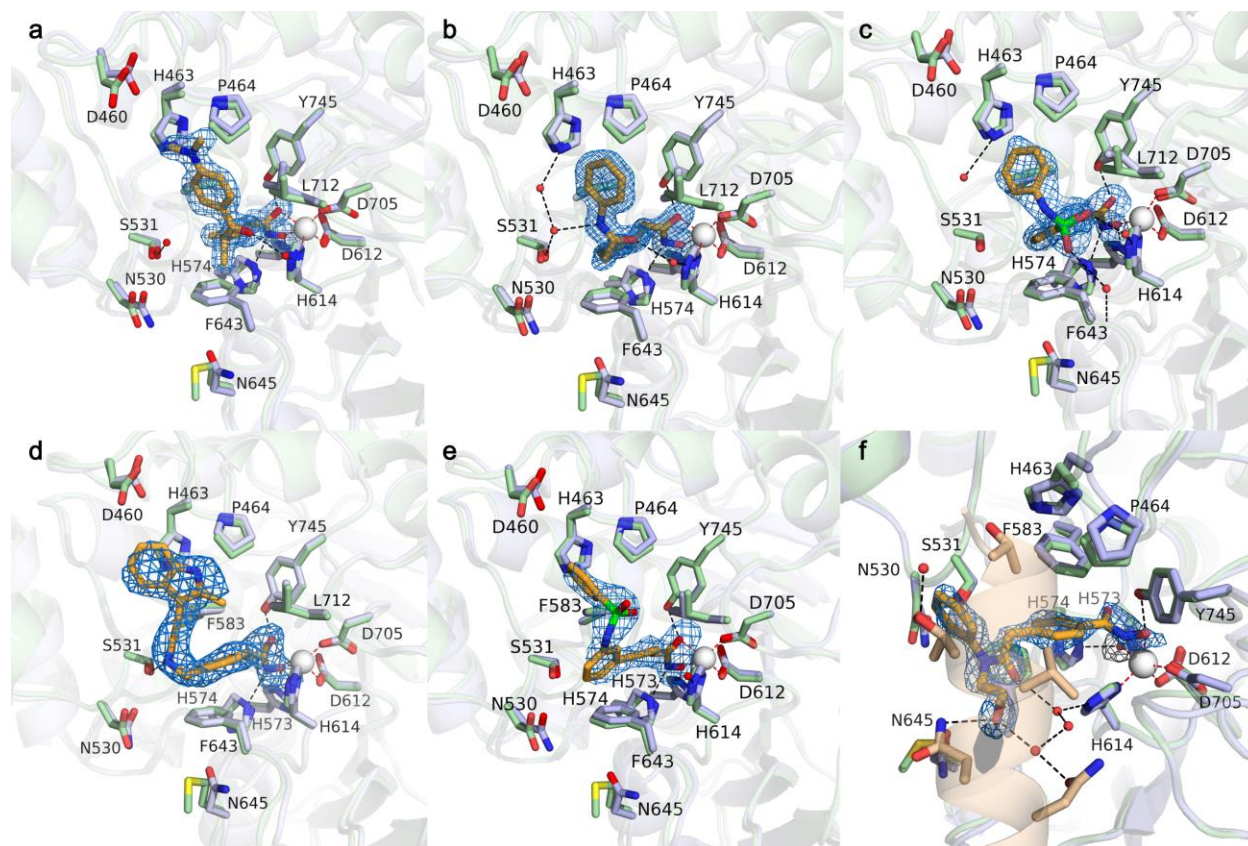

**Supplementary Figure 10. Structures of zCD2 complexed with pan-HDAC inhibitors and HDAC6-specific inhibitor HPOB.** Simulated annealing omit maps (blue mesh,  $3.0\sigma$ ) show each bound inhibitor. Metal coordination and hydrogen bond interactions are shown as red and black dashed lines, respectively;  $Zn^{2+}$  ions are shown as white spheres. Inhibitors are shown as other stick figures and are as follows: **(a)** TSA; **(b)** SAHA; **(c)** Belinostat; **(d)** Panobinostat; **(e)** Oxamflatin; and **(f)** HPOB. The cap region of HPOB interacts with an adjacent monomer (wheat helix) in the crystal lattice.

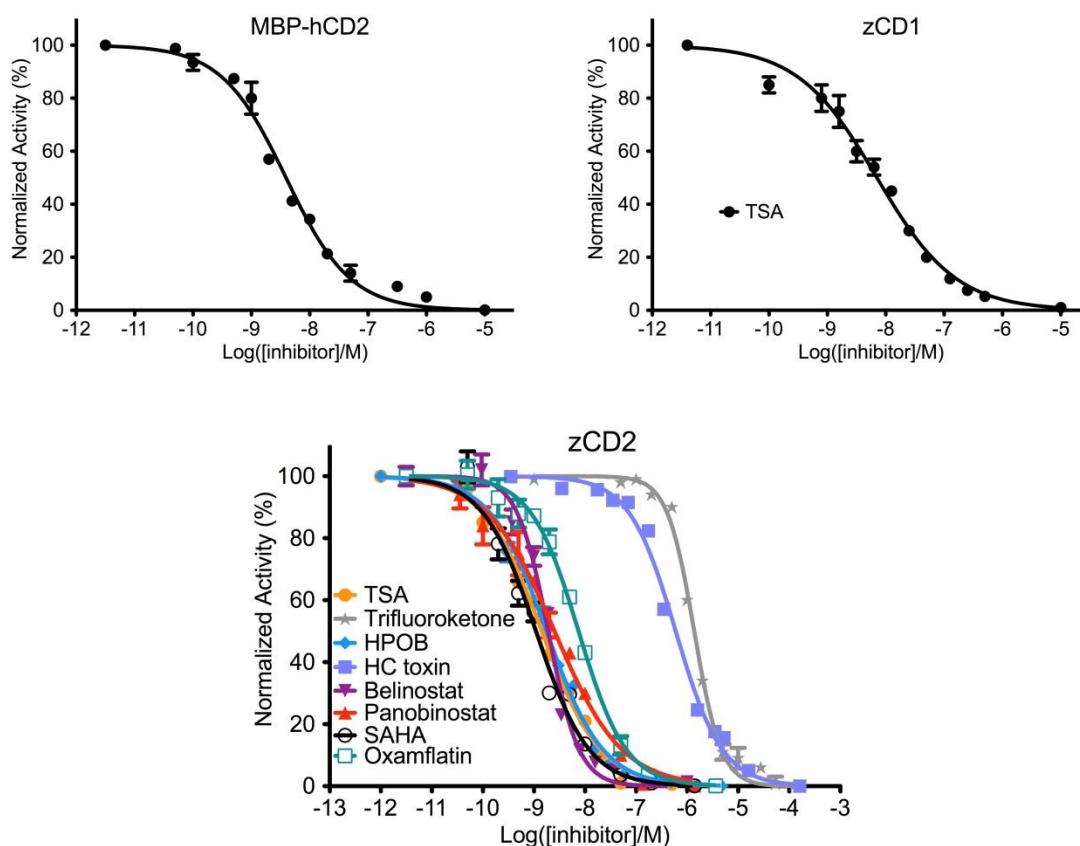

| Enzyme                | MBP-hCD2 | zCD1  | zCD2  |       |          |                  |            |              |       |            |
|-----------------------|----------|-------|-------|-------|----------|------------------|------------|--------------|-------|------------|
|                       |          |       | TSA   | HPOB  | HC toxin | Trifluoro-ketone | Belinostat | Panobinostat | SAHA  | Oxamflatin |
| IC <sub>50</sub> (nM) | 3.9      | 7     | 1.4   | 1.8   | 600      | 1400             | 1.9        | 2.5          | 1.1   | 7.5        |
|                       | ± 0.8    | ± 1   | ± 0.2 | ± 0.3 | ± 90     | ± 200            | ± 0.3      | ± 0.5        | ± 0.3 | ± 0.9      |
| K <sub>i</sub> (nM)   | 2.2      | 4.8   | 0.8   | 1.0   | 350      | 800              | 1.1        | 1.4          | 0.6   | 4.3        |
|                       | ± 0.4    | ± 0.7 | ± 0.1 | ± 0.2 | ± 50     | ± 100            | ± 0.2      | ± 0.3        | ± 0.2 | ± 0.5      |

**Supplementary Figure 11. Inhibition of HDAC6 by inhibitors used in crystal structure determinations.** Data were analyzed by logistic regression for IC<sub>50</sub> determination and the inhibition constant K<sub>i</sub> was calculated based on the Cheng-Prusoff equation assuming competitive inhibition,  $K_i = IC_{50}/(1+[S]/K_M)$ , as described in the Methods section. The enzyme concentrations used in this study were 3 nM for zCD2, 6 nM for MBP-hCD2, and 12 nM for zCD1. Since some IC<sub>50</sub> values are near the measurement threshold of [enzyme]/2, these values should be regarded as upper limits since the actual IC<sub>50</sub> may be even lower. Data represent mean ± s.e.m. (n=3).

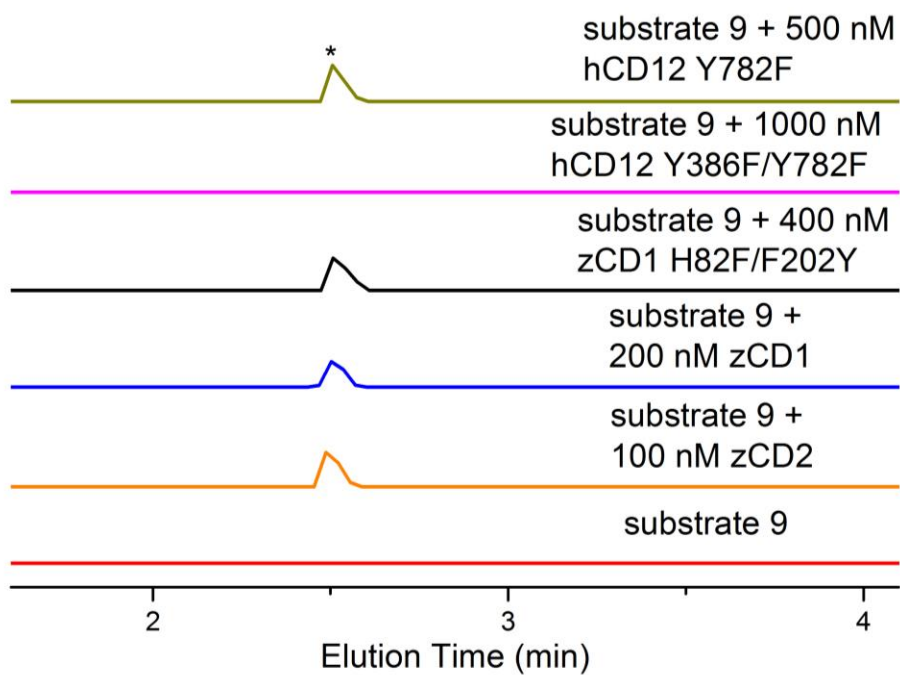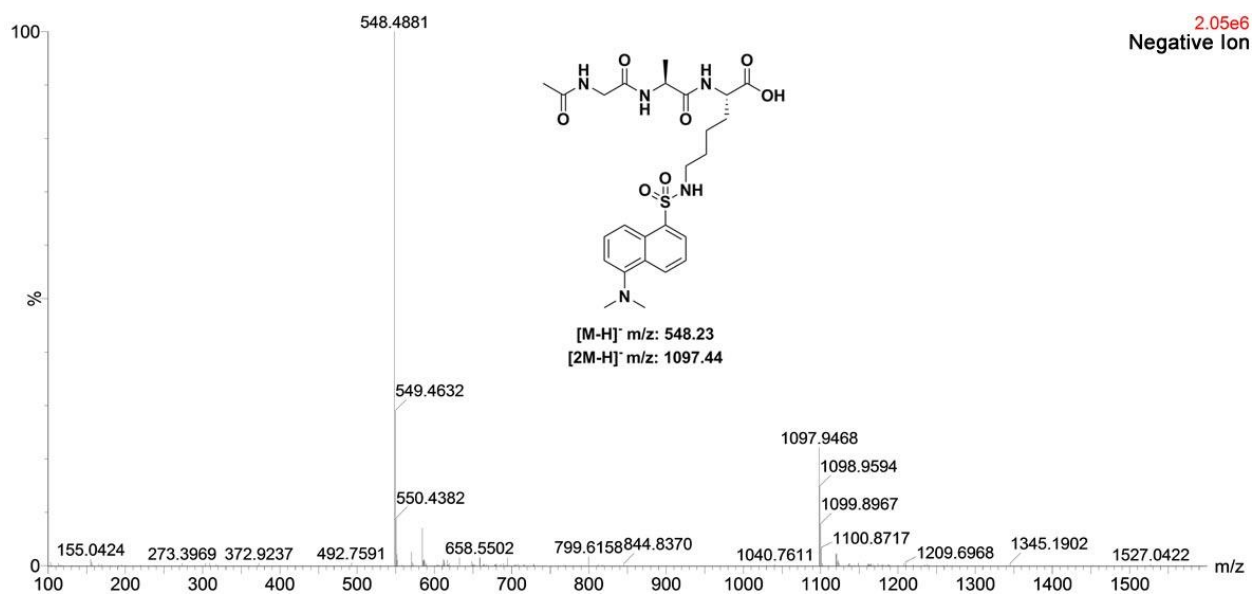

**Supplementary Figure 12.** Representative LC-MS traces (ESI-) of enzymatic reactions with substrate **9**. Due to its small size and polarity, the enzymatic product was dansylated in order to be efficiently separated from the reaction mixture for MS characterization. The enzymatic product can be quantified by comparing the integrated peak area with that of dansylamide ( $t_R = 2.40$  min) as an internal standard to determine specific activity. The full mass spectrum of the dansyl-derivatized product peak (\*) is shown below.

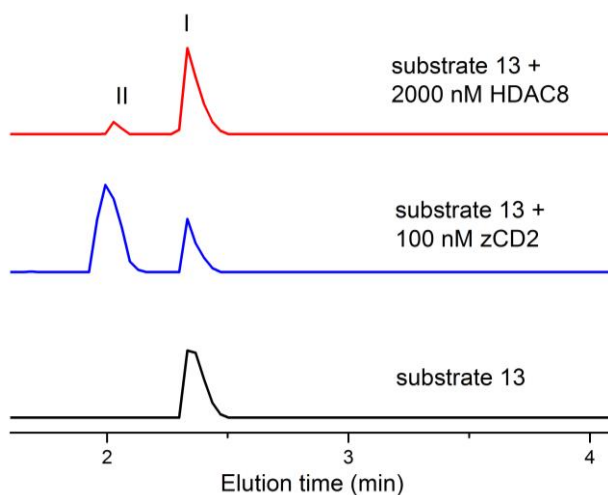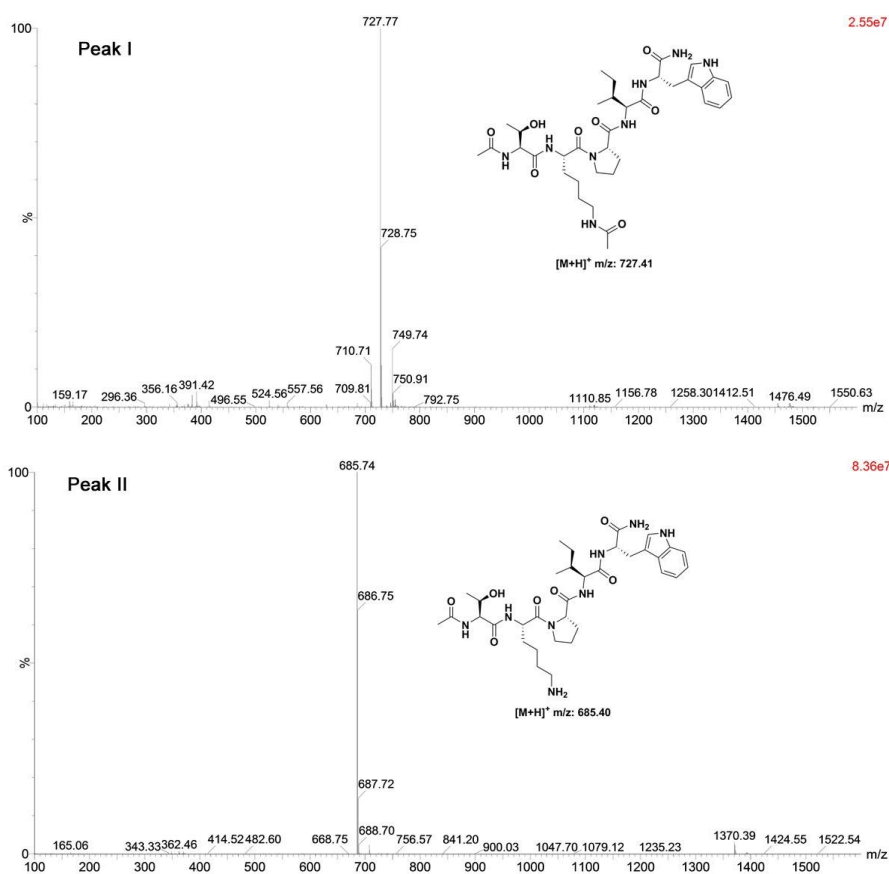

**Supplementary Figure 13.** Representative LC-MS traces (ESI+) of enzymatic reactions with substrate **13** (corresponding to residue T2930-W297 of Hsp90). Full mass spectra of substrate (I) and product (II) peaks are shown below. The enzymatic product can be quantified by comparing the integrated peak area with that of an authentic synthetic product peptide Ac-Thr-Lys-Pro-Ile-Trp-NH<sub>2</sub> as an external standard to determine specific activity.
